# Supplementary material
Source: PubMed Central journal article supplement (PMC4540926)
Supplement: JCM.00545-15_zjm999094457so1.pdf [file JCM.00545-15_zjm999094457so1.pdf]

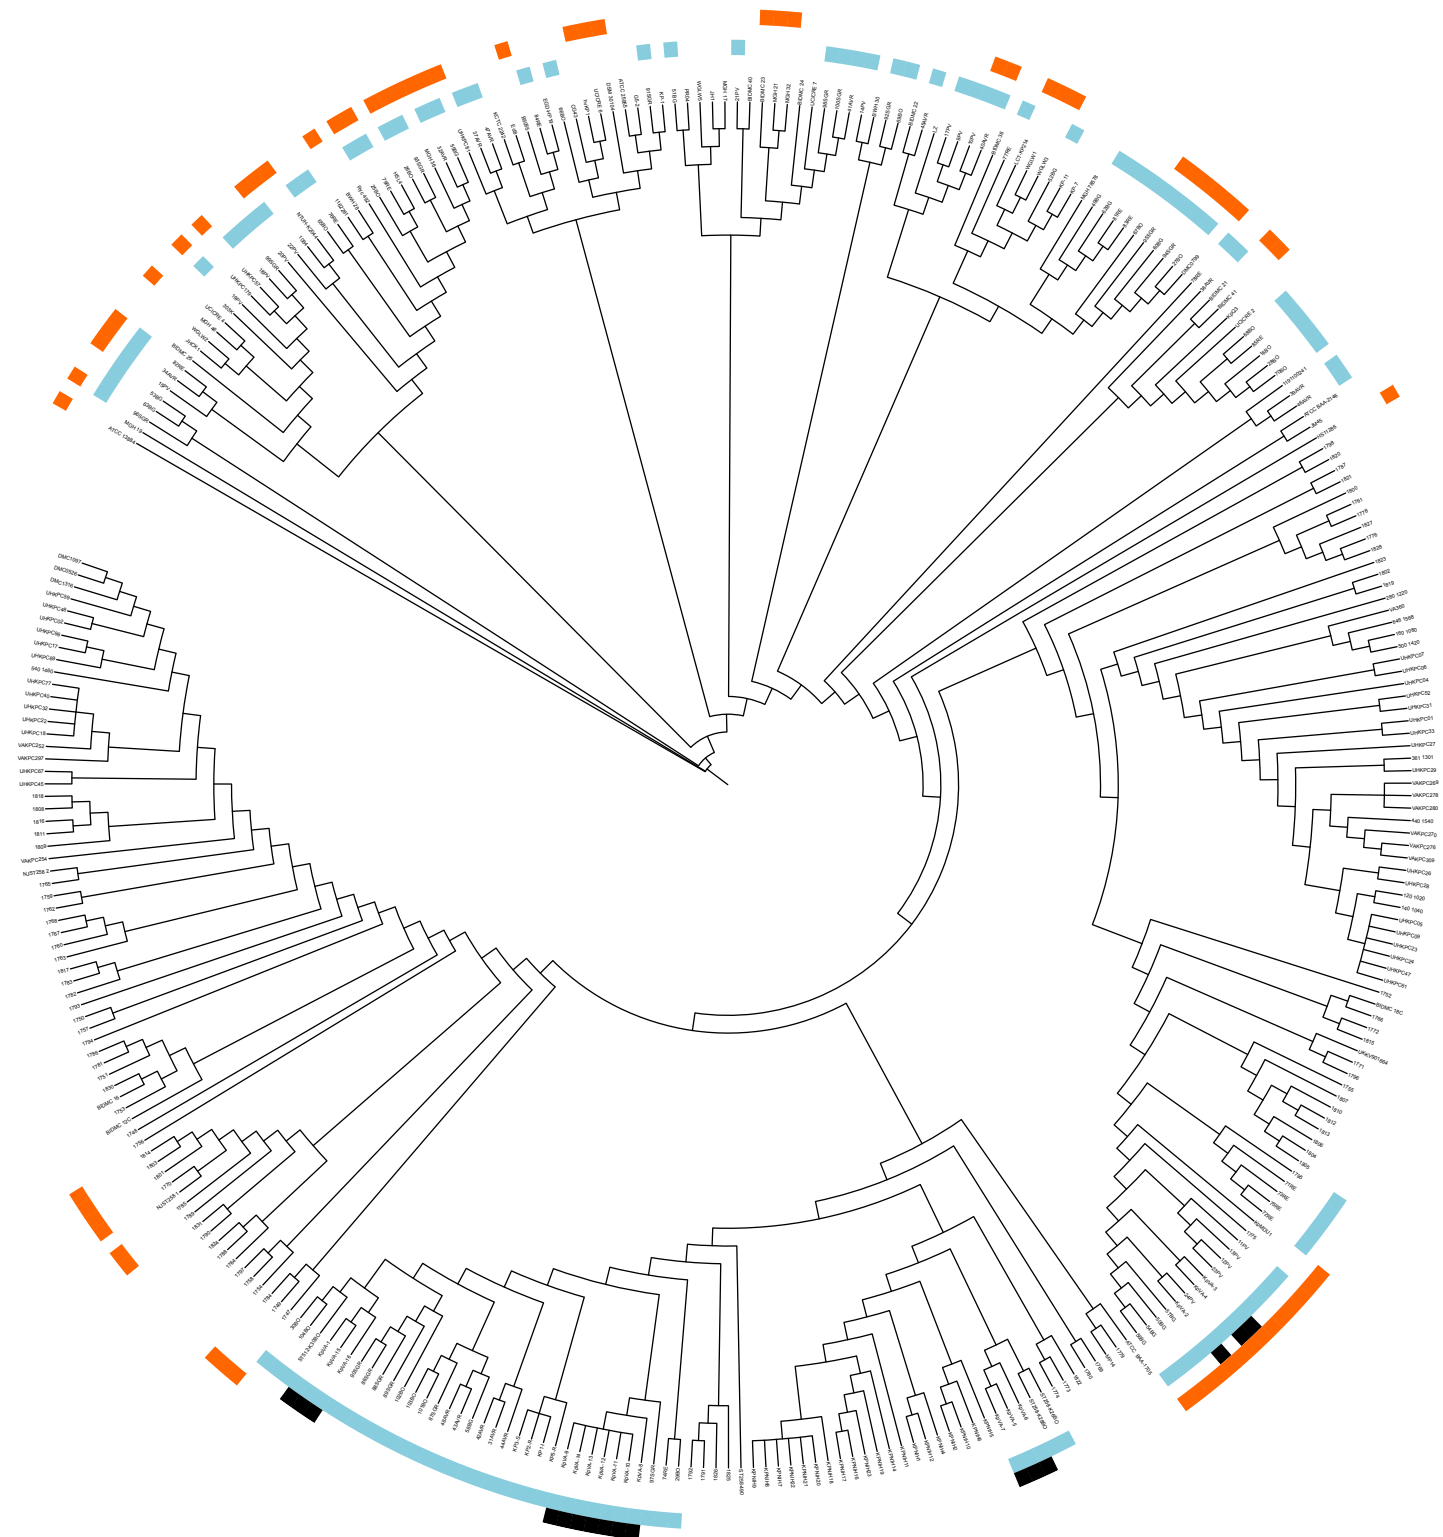

**FIG S1.** Global Maximum Likelihood phylogeny of 335 genomes of *K. pneumoniae*. Italian strains are indicated in blue, genomes characterized in this study are indicated in black, while strains expressing genes for Yersiniabactin are indicated in orange. Branch lengths are not represented and bootstrap values are not indicated for the sake of image clarity.
