# Supplementary material
Source: PubMed Central journal article supplement (PMC4540926)
Supplement: JCM.00545-15_zjm999094457so2.pdf [file JCM.00545-15_zjm999094457so2.pdf]

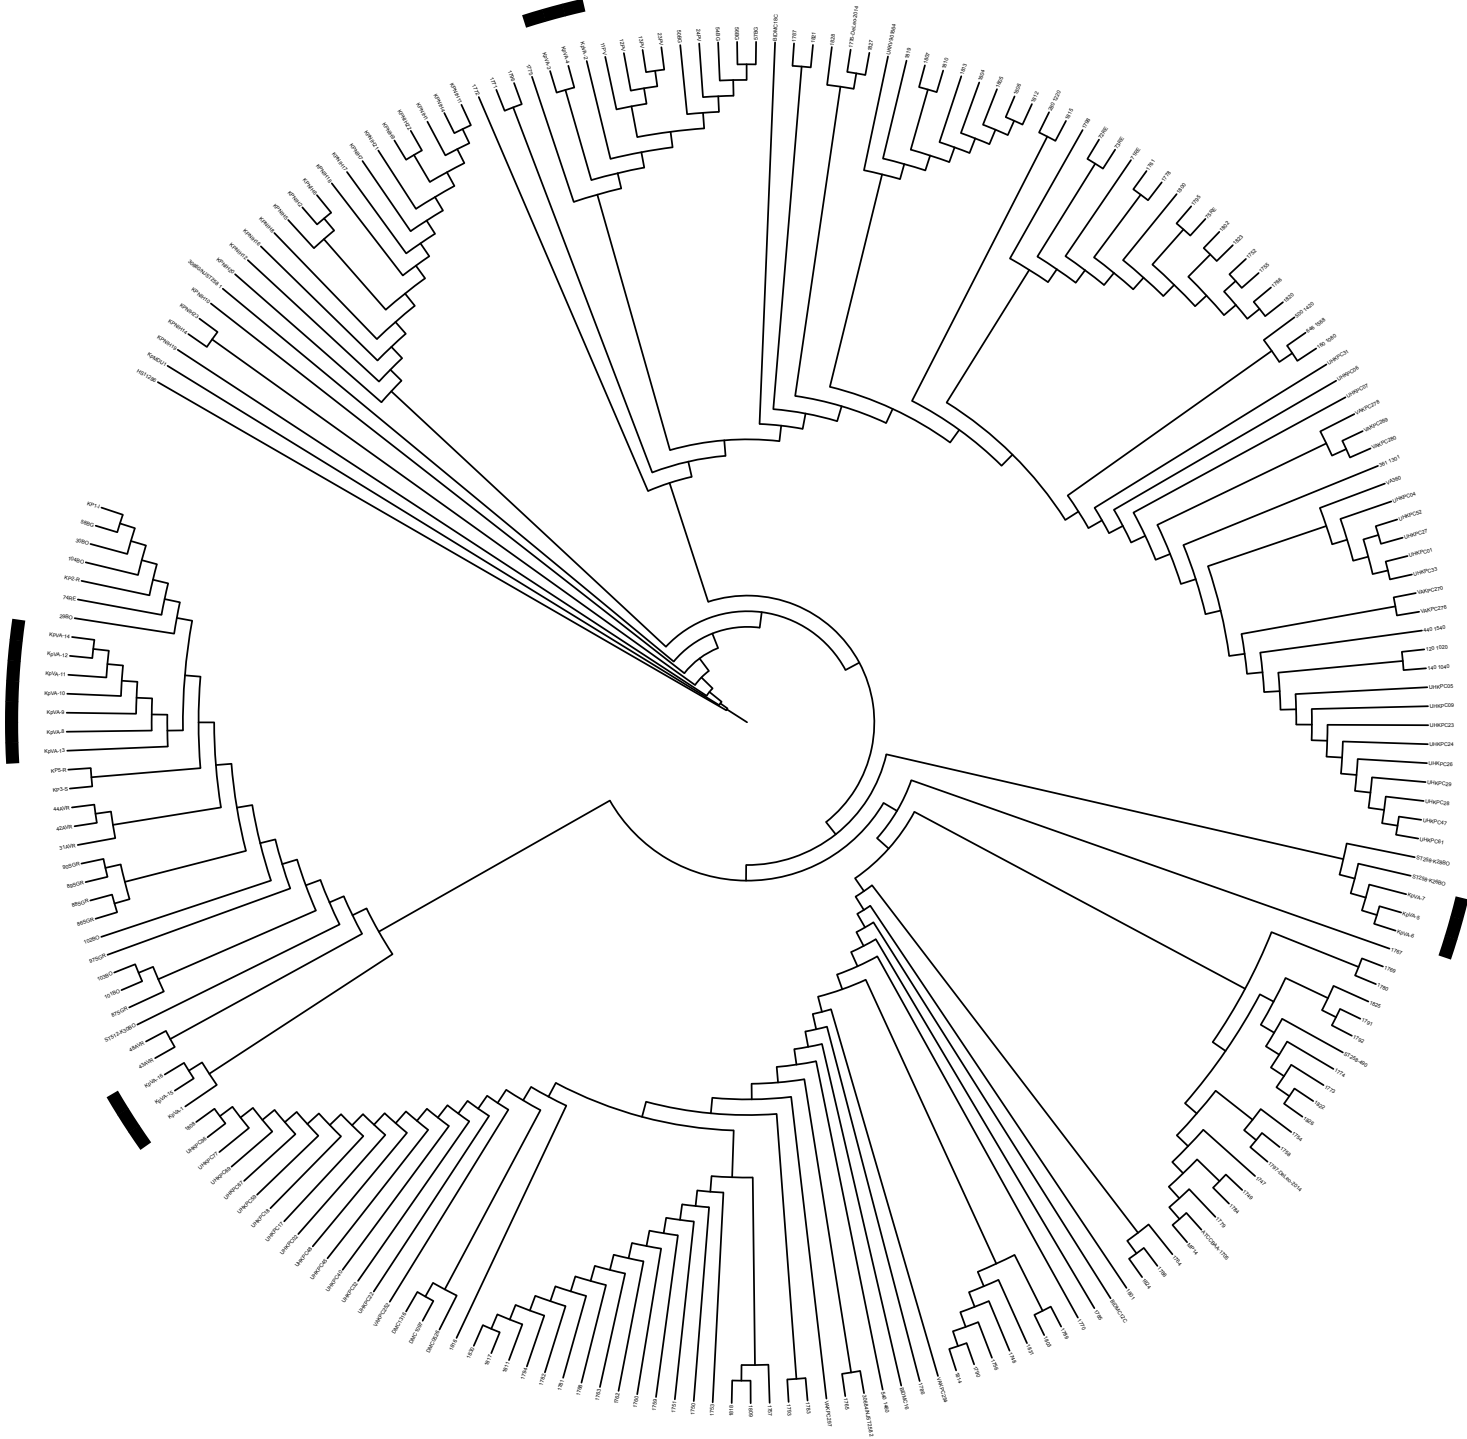

**FIG S2.** UPGMA tree of Core genome MLST (cgMLST) profiles of 219 genomes belonging to CG258, comprising the 16 novel genomes characterized in this study (indicated in black). Branch lengths are not represented and bootstrap values are not indicated for the sake of image clarity.
